# Supplementary material
Source: Springer Nature journal article supplement (https://www.springermedizin.de/resource/supplementary/12998_2011_58_MOESM15_ESM.pdf/9680054)

## Relative Changes in EMG Activity

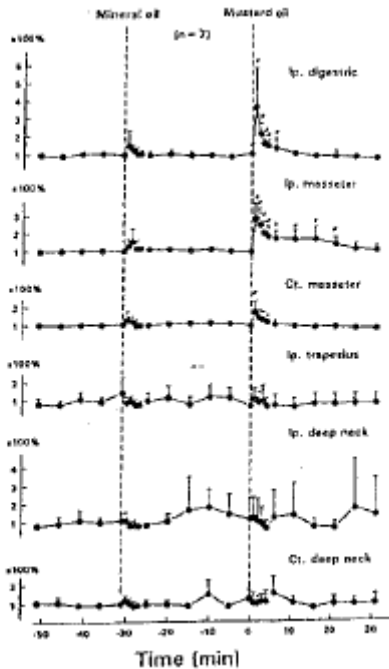

Supplement: MOESM15 [file 9680054]
